# Supplementary material for: Exploration of Nanosilver Calcium Alginate-Based Multifunctional Polymer Wafers for Wound Healing
Source: MDPI journal article supplement (doi:10.3390/pharmaceutics15020483), 2023-02-01
Supplement: s1 [file s1]

Article

# Exploration of Nanosilver Calcium Alginate-Based Multifunctional Polymer Wafers for Wound Healing

Ernest Man <sup>1</sup>, Claire Easdon <sup>2</sup>, Iain McLellan <sup>2</sup>, Humphrey H. P. Yiu <sup>3</sup> and Clare Hoskins <sup>1,\*</sup>

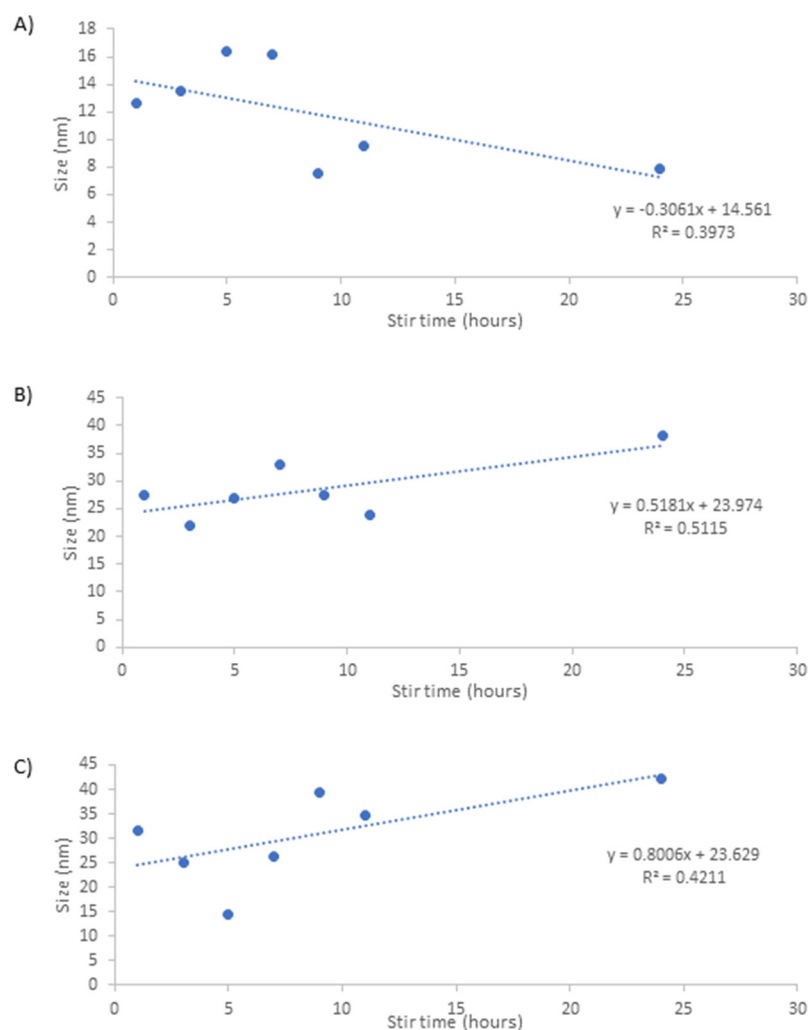

**Figure S1** Changes in standard deviation for NAA samples. (A) 1%w/v, (B) 5%w/v and (C) 10%w/v

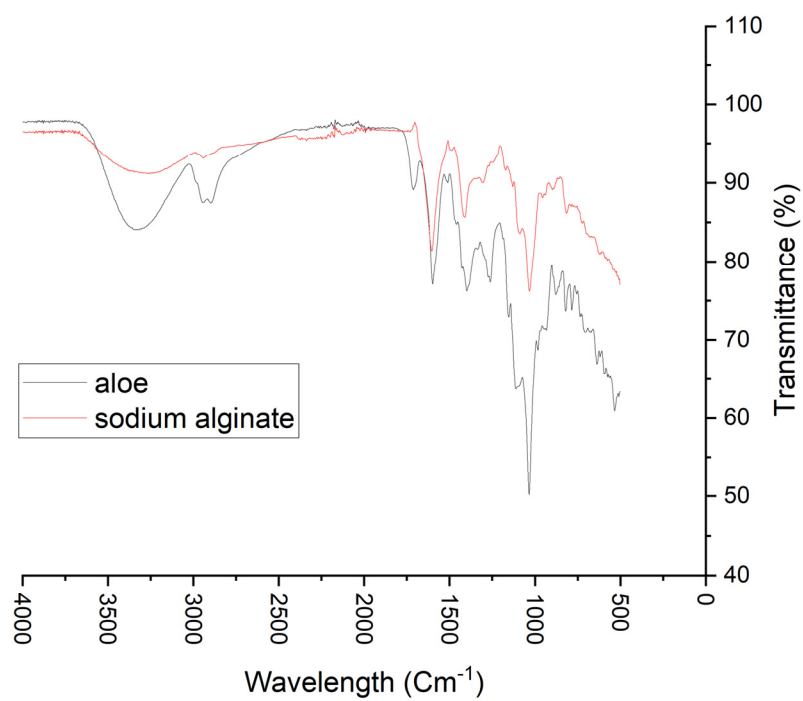

**Figure S2** FTIR spectrum of pure aloe and pure sodium alginate.

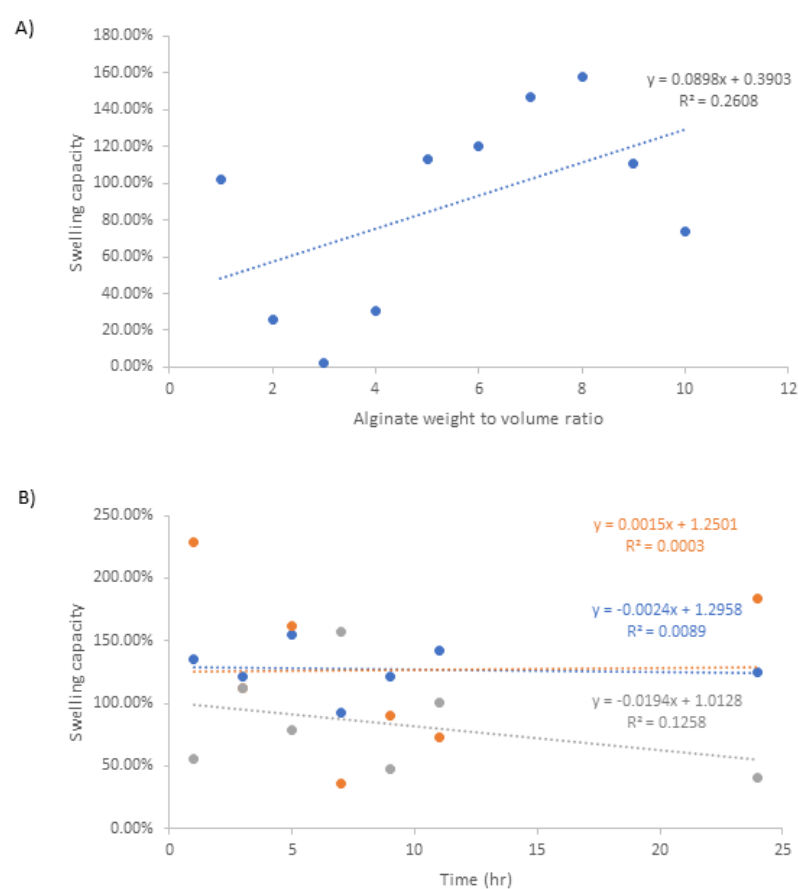

**Figure S3** (A) Standard deviation for the swelling capacity of NA samples, (B) Standard deviation for the swelling capacity of NAA samples.

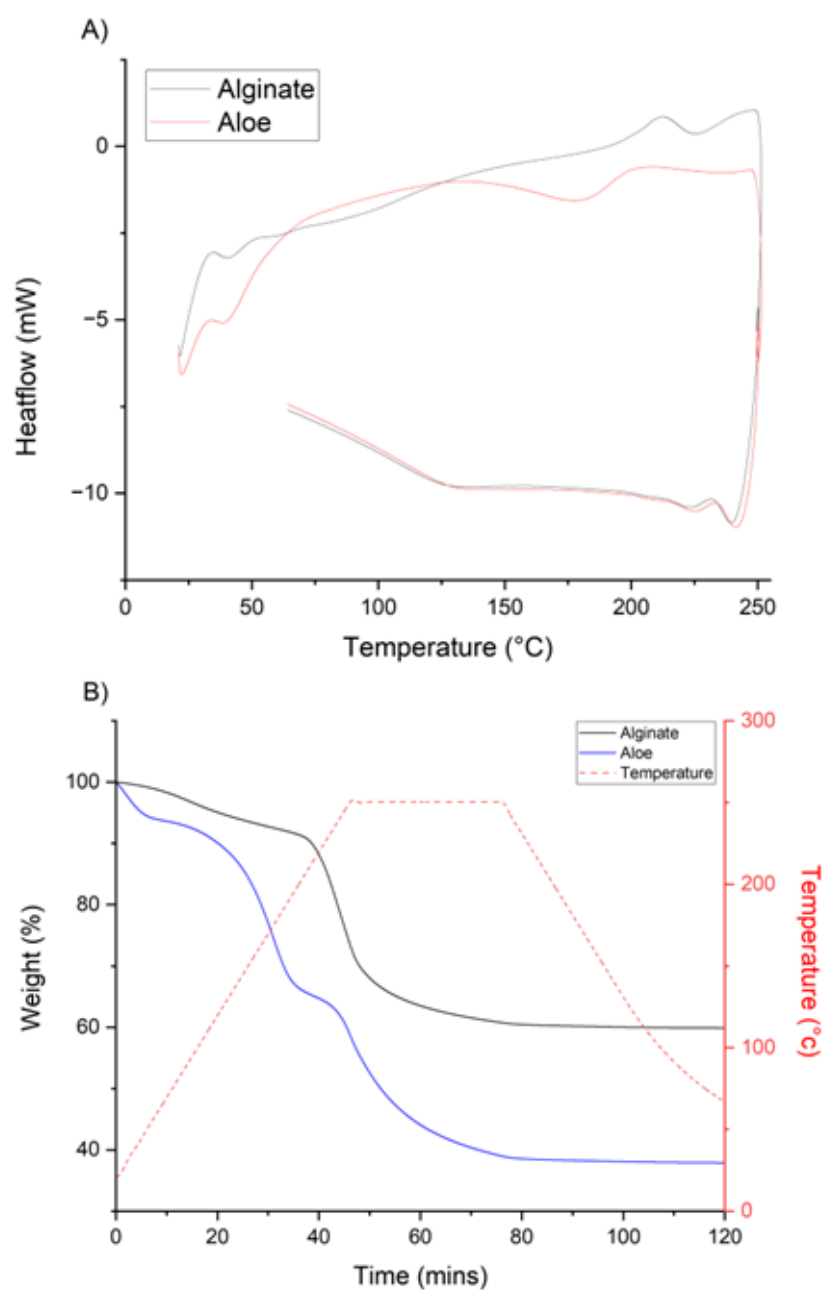

**Figure S4** (A) Graph detailing the heat flow changes of aloe and sodium alginate as a function of temperature. (B) Graph detailing the weight changes of aloe and sodium alginate as a function of temperature.
